# Supplementary material for: Solvation chemistry through synergism: static and dynamic features of n-amyl alcohol–chloroform binary solvent mixture
Source: Royal Society of Chemistry journal article supplement (doi:10.1039/c6ra23231k), 2016-01-01

## Supporting Information

# Solvation Chemistry through Synergism: Static and Dynamic Features of *n*-Amyl alcohol–Chloroform Binary Solvent Mixture

Shradhey Gupta\*

\*Dr. Harisingh Gour Central University Sagar (MP), 470003, India.

E-mail: [shradhey.iitk@gmail.com](mailto:shradhey.iitk@gmail.com)

**Figure S1.** (a) The streak camera data and (b) time-resolved emission spectra (TRES) of C480 in PtOH-CHCl<sub>3</sub> binary solvent mixture.

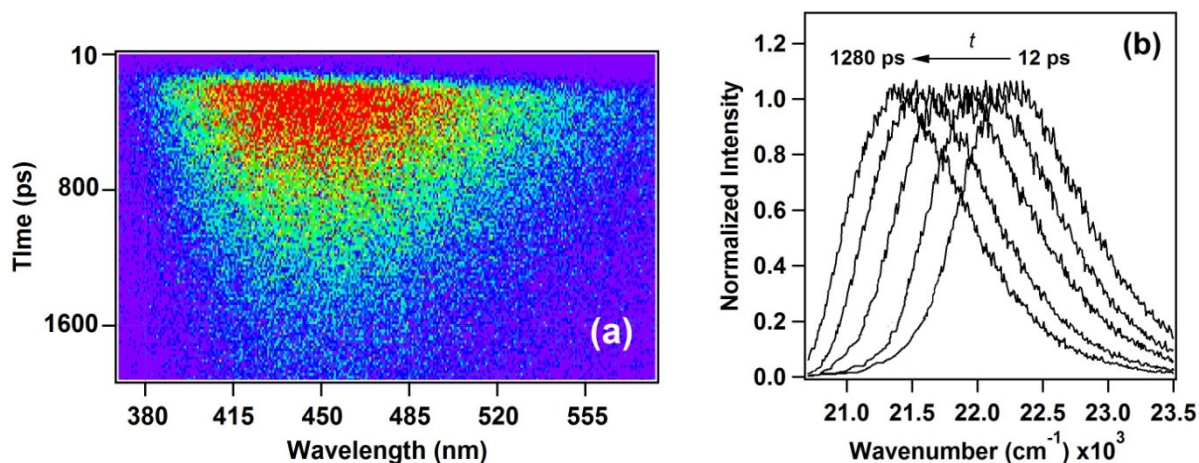

Supplement: c6ra23231k1.pdf [file c6ra23231k1.pdf]
